# Supplementary material for: The Protective Effect of the Composite Dietary Antioxidant Index on Hypertension Risk Associated with Long-term Exposure to PM 2.5 and Its Constituents: A 10-Year Cohort Study in Southwest China
Source: Research Square preprint supplement (doi:10.21203/rs.3.rs-7940122/v1), 2025-11-14
Supplement: Supplementary file 1 [file 956f8a936a062195eea36788.docx]

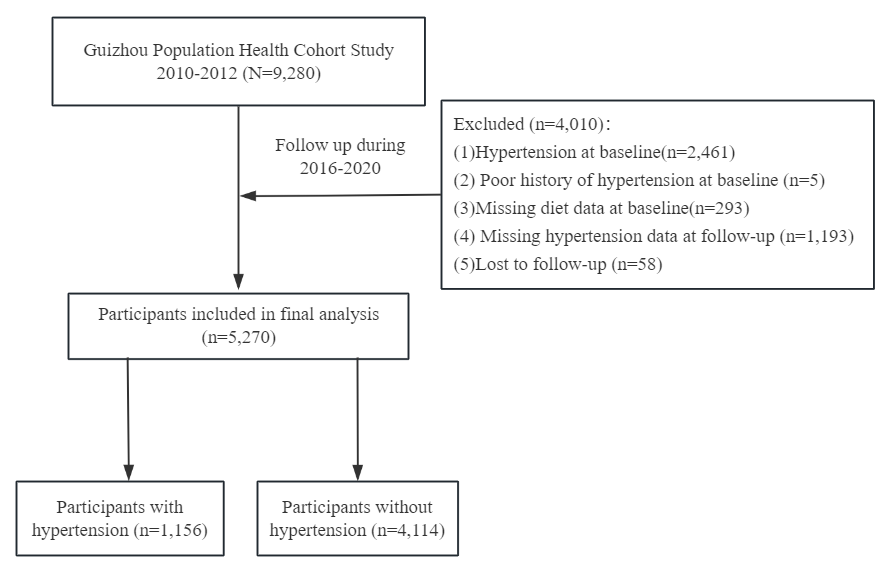


**S1. **Flowchart of the study design****


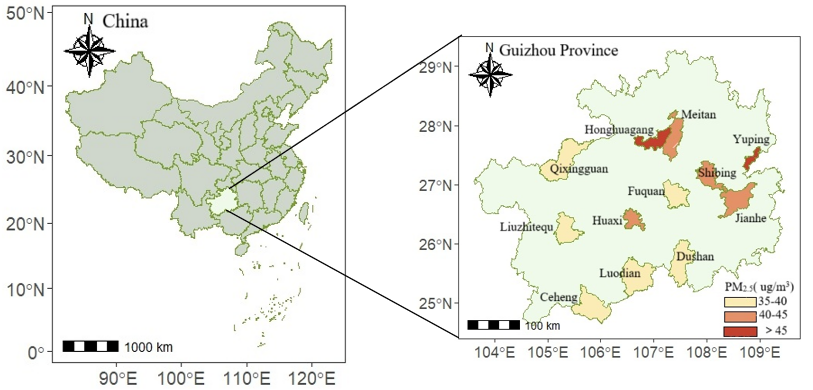


**S2. Distribution of study sites and annual average PM2.5 concentration during the study period**

The following abbreviations are used in this manuscript

| CDAI | Composite Dietary Antioxidant Index |
| --- | --- |
| PM2.5 | **Particulate Matter 2.5** |
| SO42- | **Sulfate** |
| NO3- | **Nitrate** |
| NH4+ | **Ammonium** |
| **BC** | **Black Carbon** |
| **OM** | **Organic Matter** |
| HRs | Hazard Ratios |
| 95%CIs | 95% Confidence Intervals |
| GPHCS | Guizhou Population Health Cohort Study |
| **WHO** | **World Health Organization** |
| NDVI | **Normalized Difference Vegetation Index** |
| O3 | Ozone |
| NO2 | Nitrogen Dioxide |
| FFQ | Food Frequency Questionnaire |
| FPG | Fasting Plasma Glucose |
| TG | Triglycerides |
| TC | Total Cholesterol |
| HDL-C | High-density Lipoprotein Cholesterol |
| LDL-C | Low-density Lipoprotein Cholesterol |
| OGTT | Oral Glucose Tolerance Test |
| SBP | Systolic Blood Pressure |
| DBP | Diastolic Blood Pressure |
| BMI | Body Mass Index |
| OC | **Organic Carbon** |
| **COPD** | Chronic Obstructive Pulmonary Disease |
| **SODs** | **Superoxide Dismutases** |
| **O2-** | **Superoxide Anions** |
| **GPx** | **Glutathione Peroxidase** |
| **TrxR** | **Thioredoxin Reductase** |
| **ROS** | **Reactive Oxygen Species** |
